# Supplementary material for: Community acceptance of yeast interfering RNA larvicide technology for control of Aedes mosquitoes in Trinidad
Source: PubMed Central journal article supplement (PMC7428178; doi:10.1371/journal.pone.0237675), 2020-08-14
Supplement: pone.0237675.s002.pdf [file pone.0237675.s002.pdf]

## Demographic Questions for Community Engagement Forum Participants

*Please tell us more about you (optional):*

| Question                                                                                                  | Answer                                          |              |              |                        |              |               |
|-----------------------------------------------------------------------------------------------------------|-------------------------------------------------|--------------|--------------|------------------------|--------------|---------------|
| What is your gender?                                                                                      | <i>Male</i>                                     |              |              | <i>Female</i>          |              |               |
| What is your age in years?                                                                                | <i>&lt;20</i>                                   | <i>20-29</i> | <i>30-39</i> | <i>40-49</i>           | <i>50-59</i> | <i>&gt;60</i> |
| Indicate the highest level of formal education you have completed or in which you are presently enrolled: | <i>Tertiary    Secondary    Primary    None</i> |              |              |                        |              |               |
| What is your race?                                                                                        | <i>Afro-Trinidadian</i>                         |              |              | <i>Chinese Descent</i> |              |               |
|                                                                                                           | <i>Indo-Trinidadian</i>                         |              |              | <i>Mixed Descent</i>   |              |               |
|                                                                                                           | <i>European Descent</i>                         |              |              | <i>Other</i>           |              |               |
