# Supplementary material for: Community acceptance of yeast interfering RNA larvicide technology for control of Aedes mosquitoes in Trinidad
Source: PubMed Central journal article supplement (PMC7428178; doi:10.1371/journal.pone.0237675), 2020-08-14
Supplement: pone.0237675.s005.pdf [file pone.0237675.s005.pdf]

## Mosquito Larvicide Survey

Please mark the circle which most closely represents your agreement or disagreement with the following statements about mosquito larvicides, pesticides that kill mosquito larvae.

|                                                                                                                                                                       | STRONGLY<br>AGREE     | SOMEWHAT<br>AGREE     | NEITHER<br>AGREE<br>NOR<br>DISAGREE | SOMEWHAT<br>DISAGREE  | STRONGLY<br>DISAGREE  |
|-----------------------------------------------------------------------------------------------------------------------------------------------------------------------|-----------------------|-----------------------|-------------------------------------|-----------------------|-----------------------|
| Diseases such as dengue, Zika, chikungunya, and yellow fever are caused by viruses transmitted by adult mosquitoes.                                                   | <input type="radio"/> | <input type="radio"/> | <input type="radio"/>               | <input type="radio"/> | <input type="radio"/> |
| Treating water where mosquitoes breed, to kill their eggs, larvae, and pupae, will reduce disease transmission.                                                       | <input type="radio"/> | <input type="radio"/> | <input type="radio"/>               | <input type="radio"/> | <input type="radio"/> |
| I, or someone in my household, have tried to reduce the number of mosquitoes by removing standing water around my home.                                               | <input type="radio"/> | <input type="radio"/> | <input type="radio"/>               | <input type="radio"/> | <input type="radio"/> |
| Use of larvicides will help reduce the number of mosquitoes.                                                                                                          | <input type="radio"/> | <input type="radio"/> | <input type="radio"/>               | <input type="radio"/> | <input type="radio"/> |
| I, or someone in my household, have used larvicides around my home in the past 2 years.                                                                               | <input type="radio"/> | <input type="radio"/> | <input type="radio"/>               | <input type="radio"/> | <input type="radio"/> |
| I would be willing to use larvicides to treat water around my home in the next 2 years.                                                                               | <input type="radio"/> | <input type="radio"/> | <input type="radio"/>               | <input type="radio"/> | <input type="radio"/> |
| If they are known to be safe and effective, I would use larvicides if someone in the household is pregnant.                                                           | <input type="radio"/> | <input type="radio"/> | <input type="radio"/>               | <input type="radio"/> | <input type="radio"/> |
| If they are known to be safe and effective, I would use larvicides to treat my household's drinking water.                                                            | <input type="radio"/> | <input type="radio"/> | <input type="radio"/>               | <input type="radio"/> | <input type="radio"/> |
| If genetically modified organisms (GMOs) were known to be safe and effective larvicides, I would be willing to use them.                                              | <input type="radio"/> | <input type="radio"/> | <input type="radio"/>               | <input type="radio"/> | <input type="radio"/> |
| I would be willing to buy a larvicide.<br>• (If you strongly or somewhat agree:) An affordable amount for our household to spend on larvicides each month is: \$_____ | <input type="radio"/> | <input type="radio"/> | <input type="radio"/>               | <input type="radio"/> | <input type="radio"/> |

**Optional: Please tell us more about your household:**

In the past two years, how many times has someone in your household had dengue, Zika, chikungunya, or Yellow fever? \_\_\_\_\_  
If you cannot remember exactly, it is alright to estimate.

How many adults 18-59 years of age live in your household? \_\_\_\_\_

How many children under the age of 18 years live in your household? \_\_\_\_\_

How many adults 60 years of age or older live in your household? \_\_\_\_\_

**Optional: Please tell us more about you:**

What is your gender?    Male    Female

What is your age in years?    <20    20-29    30-39    40-49    50-59    >60

What is your race?    Afro-Trinidadian    Indo-Trinidadian    European Descent    Chinese descent    Mixed descent    Other

Where do you currently live?    Urban    Rural

Indicate the highest level of formal education you completed or in which you are presently enrolled:

Tertiary    Secondary    Primary    None
